# Supplementary material for: In situ measurements of speciated atmospheric mercury and the identification of source regions in the Mexico City Metropolitan Area
Source: Copernicus journal article supplement (doi:10.5194/acp-9-207-2009), 2009-01-13

## Supplement

Figure S1 Time series plots of particulate mercury (upper panel) and reactive gaseous mercury (lower panel) at T0. Measurements were one hour averages made every other hour. The dotted lines demonstrate how well plume events in the particulate mercury data coincide with plume events in the RGM data, and vice versa.

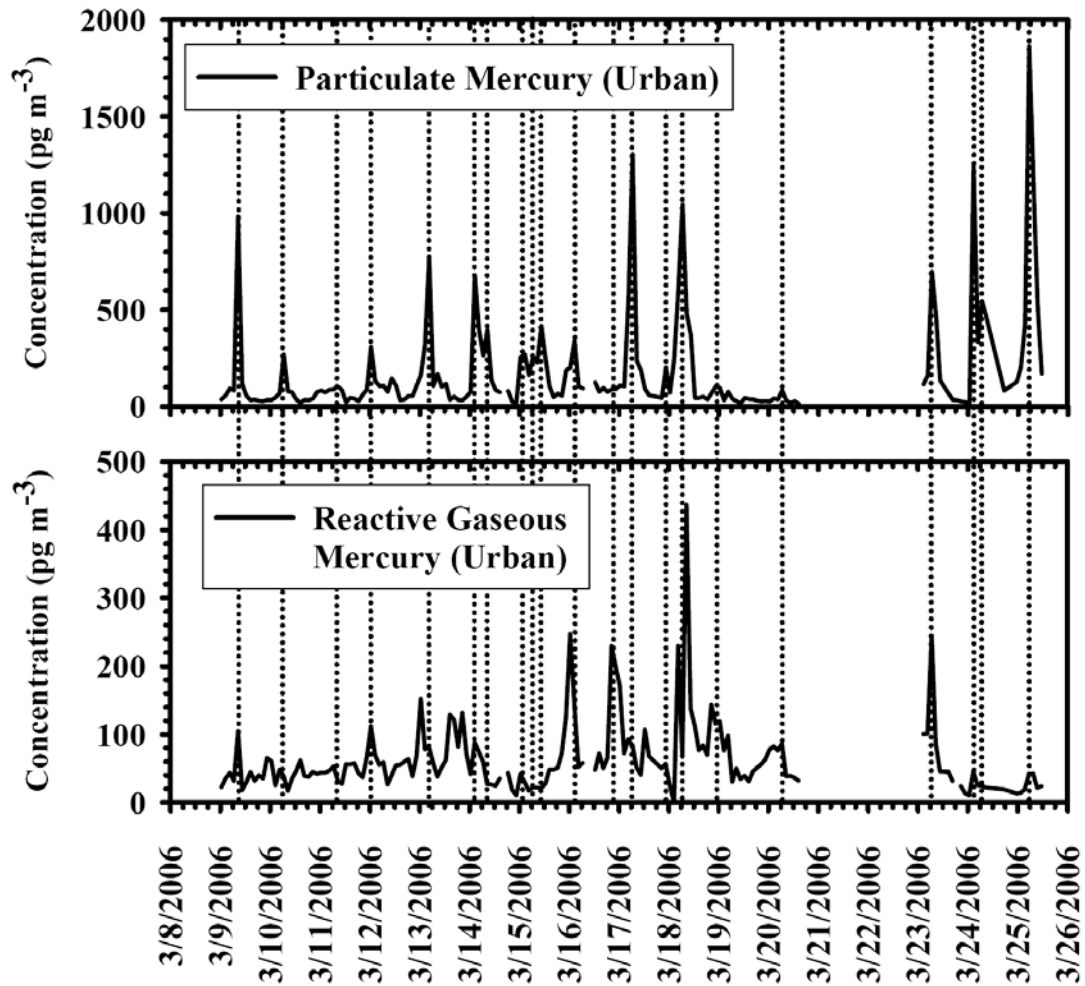

Supplement: Supplementary file 1 [file acp-9-207-2009-supplement.pdf]
